# Supplementary material for: Occurrence of Nine Grapevine Viruses in Commercial Vineyards of Mendoza, Argentina
Source: MDPI journal article supplement (doi:10.3390/v15010177), 2023-01-07
Supplement: s1 [file s1]

| Target   | Primer  | Primer sequence 5'-3'   | Product size | Reference |
|----------|---------|-------------------------|--------------|-----------|
| 18S rRNA | Forward | CGCATCATTCAAATTTCTGC    | 844          | 26        |
|          | Reverse | TTCAGCCTTGCACCATACT     |              |           |
| GLRaV-2  | Forward | GGTGATAACCGACGCCTCTA    | 543          | 26        |
|          | Reverse | CCTAGCTGACGCAGATTGCT    |              |           |
| GVB      | Forward | GTGCTAAGAACGTCTTCACAGC  | 460          | 21        |
|          | Reverse | ATCAGCAAACACGCTTGAACCG  |              |           |
| ArMV     | Forward | TGACAACATGGTATGAAGCACA  | 402          | 21        |
|          | Reverse | TATAGGGCCTTTCATCACGAAT  |              |           |
| GLRaV-3  | Forward | TACGTTAAGGACGGGACACAGG  | 336          | 26        |
|          | Reverse | TGCGGCATTAATCTTCATTG    |              |           |
| GVA      | Forward | GAGGTAGATATAGTAGGACCTA  | 272          | 26        |
|          | Reverse | TCGAACATAACCTGTGGCTC    |              |           |
| GLRaV-1  | Forward | TCTTTACCAACCCCGAGATGAA  | 232          | 26        |
|          | Reverse | GTGTCTGGTGACGTGCTAAACG  |              |           |
| GFkV     | Forward | TGACCAGCCTGCTGTCTCTA    | 179          | 26        |
|          | Reverse | TGGACAGGGAGGTGTAGGAG    |              |           |
| RSPaV    | Forward | GGGTGGGATGTAGTAACTTTGA  | 155          | 21        |
|          | Reverse | GCAAGTGAAATGAAAGCATCACT |              |           |
| GFLV     | Forward | ATGCTGGATATCGTGACCCTGT  | 118          | 26        |
|          | Reverse | GAAGGTATGCCTGCTTCAGTGG  |              |           |
| GLRaV-4  | Forward | TGAGGTCCCATGTCATGAC     | 457          | 26        |
|          | Reverse | CCTCAATCTRTTSACCAAYTCAC |              |           |

**Supplementary Table S1.** Primers used for RT-PCR for detection of grapevine viruses.

| Region             | Vineyard Location | Cultivar    | GLRaV-1 | GLRaV-2 | GLRaV-3 | GLRaV-4 | GVA | GVB | GFkV | ArMV | GFLV | RSPaV |
|--------------------|-------------------|-------------|---------|---------|---------|---------|-----|-----|------|------|------|-------|
| Primera Zona       | Agrelo            | Malbec      | 0%      | 0%      | 0%      | 0%      | 0%  | 0%  | 0%   | 0%   | 100% | 100%  |
| Primera Zona       | Lunlunta          | Malbec      | 20%     | 0%      | 50%     | 0%      | 20% | 0%  | 60%  | 60%  | 0%   | 100%  |
| Primera Zona       | Lunlunta          | Malbec      | 0%      | 0%      | 10%     | 0%      | 0%  | 0%  | 0%   | 0%   | 40%  | 100%  |
| Primera Zona       | Lunlunta          | Malbec      | 0%      | 0%      | 10%     | 0%      | 0%  | 0%  | 0%   | 0%   | 80%  | 60%   |
| Primera Zona       | Lunlunta          | Malbec      | 0%      | 11%     | 0%      | 0%      | 0%  | 0%  | 0%   | 0%   | 67%  | 78%   |
| Upper Valle de Uco | Gualtallary       | C.sauvignon | 0%      | 0%      | 0%      | 43%     | 0%  | 0%  | 29%  | 0%   | 14%  | 57%   |
| Upper Valle de Uco | Gualtallary       | Malbec      | 0%      | 0%      | 0%      | 0%      | 0%  | 0%  | 0%   | 0%   | 29%  | 57%   |
| Upper Valle de Uco | Gualtallary       | Pinot noir  | 0%      | 0%      | 0%      | 0%      | 0%  | 0%  | 100% | 0%   | 0%   | 100%  |
| Upper Valle de Uco | Gualtallary Alto  | Chardonnay  | 0%      | 0%      | 0%      | 0%      | 0%  | 0%  | 14%  | 0%   | 0%   | 86%   |
| Upper Valle de Uco | Gualtallary Alto  | Malbec      | 0%      | 0%      | 0%      | 0%      | 0%  | 0%  | 0%   | 0%   | 86%  | 100%  |
| Upper Valle de Uco | Gualtallary Alto  | Pinot noir  | 0%      | 0%      | 0%      | 0%      | 0%  | 0%  | 29%  | 0%   | 0%   | 71%   |
| Upper Valle de Uco | Villa Bastias     | Pinot noir  | 14%     | 14%     | 0%      | 0%      | 0%  | 0%  | 57%  | 0%   | 0%   | 0%    |
| Lower Valle de Uco | Cordon del Plata  | Chardonnay  | 0%      | 67%     | 0%      | 0%      | 67% | 0%  | 33%  | 33%  | 0%   | 100%  |
| Lower Valle de Uco | Cordon del Plata  | Chardonnay  | 0%      | 0%      | 0%      | 0%      | 86% | 0%  | 57%  | 14%  | 0%   | 100%  |
| Lower Valle de Uco | El Cepillo        | C.sauvignon | 0%      | 13%     | 13%     | 0%      | 0%  | 0%  | 13%  | 0%   | 0%   | 75%   |
| Lower Valle de Uco | El Cepillo        | Malbec      | 0%      | 0%      | 0%      | 0%      | 0%  | 0%  | 0%   | 0%   | 56%  | 19%   |
| Lower Valle de Uco | El Cepillo        | Malbec      | 0%      | 0%      | 0%      | 0%      | 0%  | 0%  | 0%   | 0%   | 0%   | 0%    |
| Lower Valle de Uco | La Consulta       | C.franc     | 100%    | 57%     | 0%      | 0%      | 0%  | 0%  | 0%   | 0%   | 0%   | 100%  |
| Lower Valle de Uco | La Consulta       | C.sauvignon | 0%      | 0%      | 10%     | 0%      | 0%  | 0%  | 0%   | 0%   | 0%   | 40%   |
| Lower Valle de Uco | La Consulta       | C.sauvignon | 0%      | 0%      | 10%     | 10%     | 10% | 0%  | 10%  | 0%   | 70%  | 100%  |
| Lower Valle de Uco | La Consulta       | Malbec      | 0%      | 0%      | 0%      | 0%      | 14% | 0%  | 0%   | 29%  | 0%   | 71%   |
| Lower Valle de Uco | La Consulta       | Malbec      | 0%      | 20%     | 10%     | 0%      | 20% | 0%  | 10%  | 60%  | 30%  | 40%   |
| Lower Valle de Uco | La Consulta       | Malbec      | 0%      | 0%      | 0%      | 0%      | 0%  | 0%  | 0%   | 0%   | 50%  | 100%  |
| Lower Valle de Uco | Los Arboles       | Malbec      | 0%      | 71%     | 0%      | 0%      | 0%  | 0%  | 100% | 0%   | 0%   | 100%  |
| East Region        | El Mirador        | Aspirant B. | 0%      | 78%     | 22%     | 11%     | 0%  | 0%  | 89%  | 0%   | 0%   | 78%   |
| East Region        | Rivadavia         | AspirantB.  | 86%     | 100%    | 43%     | 57%     | 43% | 0%  | 0%   | 29%  | 71%  | 100%  |

**Supplementary Table S2.** Occurrence of grapevine viruses in the surveyed blocks.
